# Supplementary material for: Effects, barriers and facilitators in predischarge home assessments to improve the transition of care from the inpatient care to home in adult patients: An integrative review
Source: Research Square preprint supplement (doi:10.21203/rs.3.rs-28272/v2), 2020-12-14
Supplement: Supplementary file 1 [file e70f964263ccd2d52a936173.docx]

| **search strategy exemplary for MEDLINE via PubMed** | | |
| --- | --- | --- |
|  |  | discharge |
|  | ***OR*** | inpatient |
|  | ***OR*** | "subacute care" |
|  | ***OR*** | "acute care" |
|  | ***OR*** | rehabilitation [MeSH Term] |
|  | | |
| ***AND*** |  | "house calls"[Mesh] |
|  | ***OR*** | "home visiting" |
| ***OR*** | "home visit" |
| ***OR*** | "environmental assessment" |
| ***OR*** | "assessment visit" |
|  | ***OR*** | "home safety" |
| ***OR*** | "home modification" |
| ***OR*** | "environmental modification" |
| ***OR*** | "weekend passes" |
| ***OR*** | "weekend pass" |
|  | | |
| *(discharge OR inpatient OR "subacute care" OR "acute care" OR rehabilitation [MeSH Term])AND("House Calls"[Mesh] OR "home visiting" OR "home visit" OR "environmental assessment" OR "assessment visit" OR "home safety" OR "home modification" OR "environmental modification" OR "weekend passes" OR “weekend pass”)* | | |
| ***Results:*** | | [983](https://www.ncbi.nlm.nih.gov/pubmed/?cmd=HistorySearch&querykey=14) (*21.06.2018 – 16:00)* |

**Additional file 1**

***Search strategy and characteristics of excluded references***

|  | **Search Strategy** |
| --- | --- |
| **1** | discharge |
| **2** | inpatient |
| **3** | "subacute care" |
| **4** | "acute care" |
| **5** | rehabilitation [MeSH Term] |
| **6** | **1 OR 2 OR 3 OR 4 OR 5** |
| **7** | "house calls"[Mesh] |
| **8** | "home visiting" |
| **9** | "home visit" |
| **10** | "environmental assessment" |
| **11** | "assessment visit" |
| **12** | "home safety" |
| **13** | "home modification" |
| **14** | "environmental modification" |
| **15** | "weekend passes" |
| **16** | "weekend pass" |
| **17** | **7 OR 8 OR 9 OR 10 OR 11 OR 12 OR 13 OR 14 OR 15 OR 16** |
| **18** | **6 AND 17** |

***Excluded references***

| **Excluded references** | |
| --- | --- |
| Cahill, 2008 | not found by full text search |
| Cumming, 1999 | time point of home visit not only pre-discharge |
| Gursen, 2003 | time point of home visit unclear |
| Napolitan, 1999 | not found by full text search |
| Sanford, 2004 | Wrong study question |
| Yeung, 2012 | not found by full text search |
| Aplin, 2013 | study explores stakeholders’ views on home modifications in general, not in the scope of predischarge home assessments |
| Lau, 2018 | study explores stakeholders’ views on home modifications in general, not in the scope of predischarge home assessments |
| Lo Bianco, 2020 | study explores stakeholders’ views on home modifications in general, not in the scope of predischarge home assessments |
